# Supplementary material for: Statistical analysis of Goal Attainment Scaling endpoints in randomised trials
Source: PubMed Central journal article supplement — Stat Methods Med Res. 2018 Jun 19;28(6):1893–910. doi: 10.1177/0962280218777896 (PMC6566461; doi:10.1177/0962280218777896), 2018-06-19
Supplement: Supplemental_material.pdf [file Supplemental_material.pdf]

## Supplemental material

**Table S1.** Operating characteristics of a parallel group trial with 30 patients compared to a cross-over trial with 15 patients for the reference scenario with expected effect size  $\delta = 0.5$ . The power ( $10^4$  simulation runs) and type I error rate (T1E,  $10^5$  simulation runs) is given for the unweighted (no w), patient preference weighted (patient w), and treatment effect weighted (effect w) scores. Note that under the null hypothesis the treatment effect weighted and unweighted case coincide.

| Design                                     | $\rho_0$ | Method  | Power |           |          | T1E   |           |
|--------------------------------------------|----------|---------|-------|-----------|----------|-------|-----------|
|                                            |          |         | no w  | patient w | effect w | no w  | patient w |
| Parallel group design                      | 0.3      | Mean    | 0.34  | 0.33      | 0.44     | 0.050 | 0.050     |
|                                            |          | Kiresuk | 0.37  | 0.35      | 0.46     | 0.050 | 0.050     |
|                                            |          | GEE     | 0.39  | 0.37      | 0.49     | 0.056 | 0.056     |
| Cross-over design<br>$\rho_\epsilon = 0$   | 0.3      | Mean    | 0.53  | 0.49      | 0.70     | 0.049 | 0.050     |
|                                            |          | Kiresuk | 0.57  | 0.53      | 0.69     | 0.050 | 0.051     |
|                                            |          | GEE 1   | 0.65  | 0.58      | 0.73     | 0.067 | 0.070     |
|                                            |          | GEE 2   | 0.65  | 0.59      | 0.73     | 0.055 | 0.055     |
| Cross-over design<br>$\rho_\epsilon = 0.3$ | 0.3      | Mean    | 0.70  | 0.64      | 0.86     | 0.048 | 0.049     |
|                                            |          | Kiresuk | 0.74  | 0.67      | 0.85     | 0.050 | 0.049     |
|                                            |          | GEE 1   | 0.81  | 0.71      | 0.88     | 0.066 | 0.068     |
|                                            |          | GEE 2   | 0.82  | 0.73      | 0.89     | 0.054 | 0.055     |
| Parallel group design                      | 0        | Mean    | 0.43  | 0.40      | 0.51     | 0.049 | 0.050     |
|                                            |          | Kiresuk | 0.48  | 0.44      | 0.56     | 0.050 | 0.050     |
|                                            |          | GEE     | 0.55  | 0.50      | 0.65     | 0.062 | 0.062     |
| Cross-over design<br>$\rho_\epsilon = 0$   | 0        | Mean    | 0.43  | 0.39      | 0.58     | 0.047 | 0.050     |
|                                            |          | Kiresuk | 0.46  | 0.42      | 0.57     | 0.049 | 0.050     |
|                                            |          | GEE 1   | 0.53  | 0.47      | 0.61     | 0.068 | 0.070     |
|                                            |          | GEE 2   | 0.53  | 0.47      | 0.61     | 0.055 | 0.056     |
| Cross-over design<br>$\rho_\epsilon = 0.3$ | 0        | Mean    | 0.53  | 0.48      | 0.70     | 0.047 | 0.047     |
|                                            |          | Kiresuk | 0.57  | 0.51      | 0.69     | 0.048 | 0.049     |
|                                            |          | GEE 1   | 0.64  | 0.55      | 0.73     | 0.066 | 0.068     |
|                                            |          | GEE 2   | 0.64  | 0.55      | 0.73     | 0.054 | 0.055     |

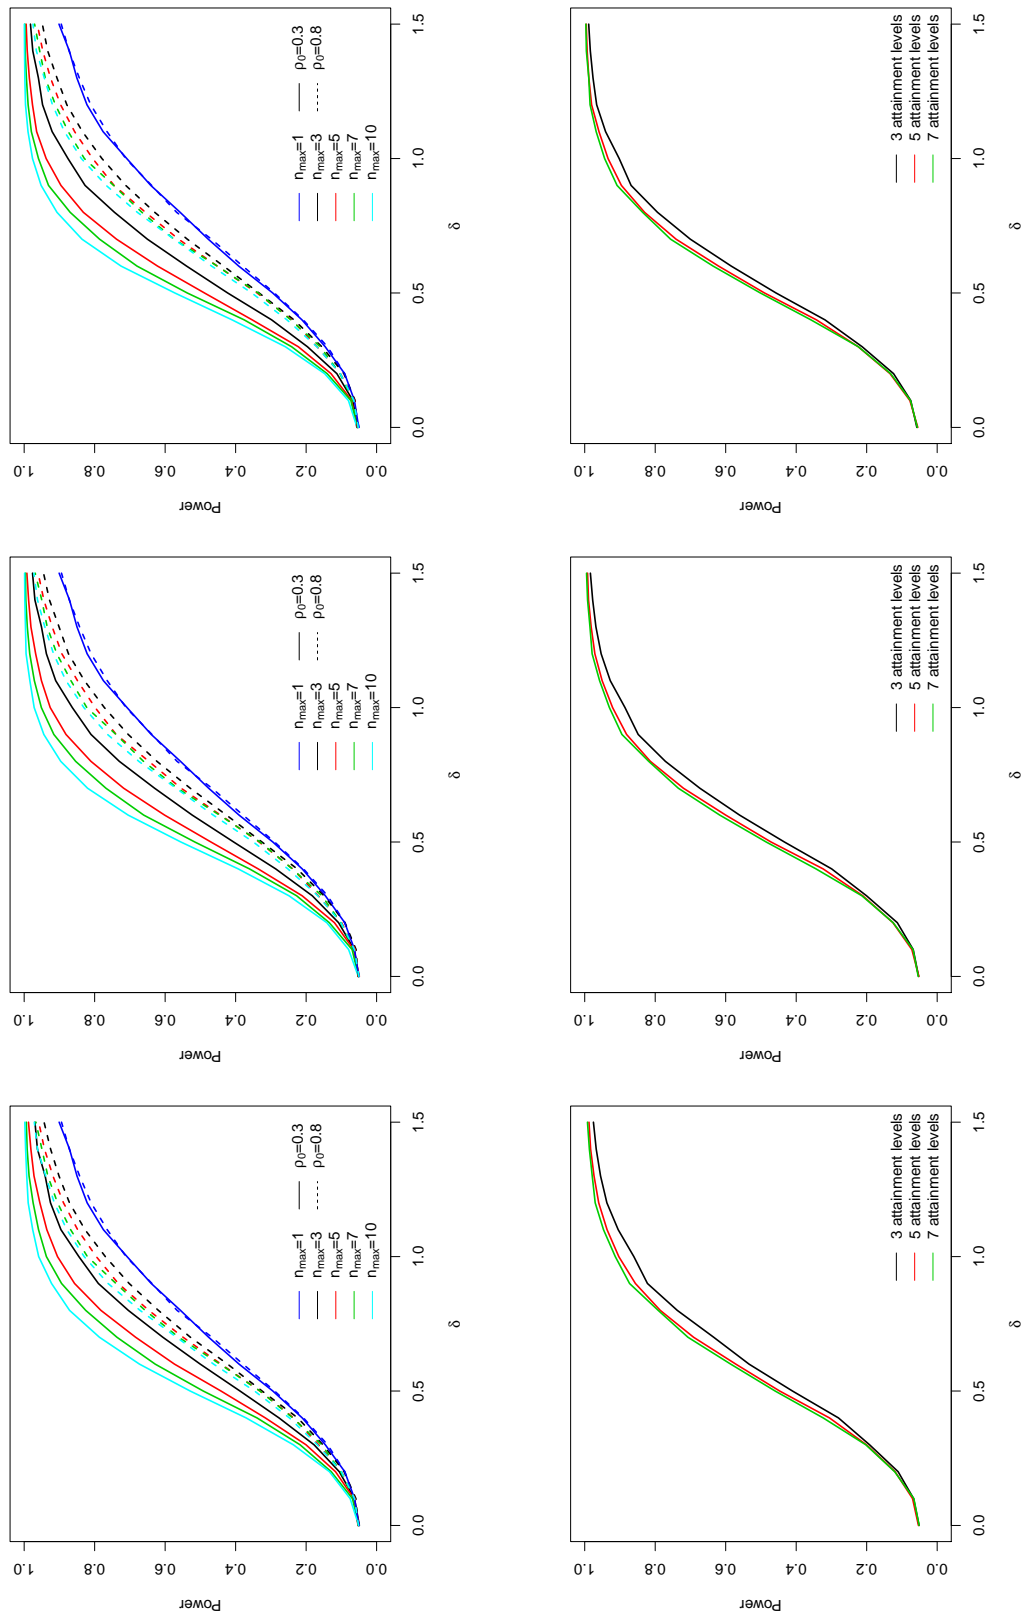

**Figure S1.** First row: The power for  $m = 40$  and different maximum number of goals ( $n_{max} = 1, 3, 5, 7, 10$ ) and correlations  $\rho_0 = 0.3, 0.8$ : (left) t-test applied to the per-subject means, (middle) standardized per-subject means, and (right) the test based on the GEE model. Second row: The power if discrete attainment scores with  $L = 3, 5,$  and  $7$  levels such that  $c_j = \phi^{-1}(j/L), j = 1, \dots, L$  and  $\rho_0 = 0.3$  are used: (left) t-test applied to the per-subject means, (middle) standardized per-subject means, and (right) the test based on the GEE model, where  $\rho = 0.3$  and  $n_{max} = 5$ .
